# Supplementary material for: Transcriptome analysis of bacteriophage communities in periodontal health and disease
Source: PubMed Central journal article supplement (PMC4515923; doi:10.1186/s12864-015-1781-0), 2015-07-28
Supplement: 12864_2015_1781_MOESM1_ESM.pdf [file 12864_2015_1781_MOESM1_ESM.pdf]

**Supplemental Table 1.** Study subjects.

| <b>Subject</b> | <b>Age</b> | <b>Ethnicity</b> | <b>Sex</b> | <b>Diagnosis</b>                           |
|----------------|------------|------------------|------------|--------------------------------------------|
| H1             | 25         | Asian            | M          | Health                                     |
| H2             | 25         | Caucasian        | M          | Health                                     |
| H3             | 51         | Latino           | F          | Moderate Gingivitis                        |
| H4             | 34         | African American | M          | Health                                     |
| H5             | 32         | Asian            | F          | Health                                     |
| H6             | 24         | Asian            | F          | Health                                     |
| H7             | 27         | Caucasian        | M          | Health                                     |
| H8             | 44         | Caucasian        | F          | Chronic Mild Generalized Periodontitis     |
| H9             | 50         | Latino           | F          | Chronic Mild Generalized Periodontitis     |
| D1             | 73         | Caucasian        | M          | Chronic Severe Generalized Periodontitis   |
| D2             | 66         | Caucasian        | M          | Chronic Severe Generalized Periodontitis   |
| D3             | 62         | Caucasian        | F          | Chronic Moderate Generalized Periodontitis |
| D4             | 69         | Caucasian        | M          | Chronic Severe Generalized Periodontitis   |
| D5             | 48         | Caucasian        | F          | Chronic Moderate Generalized Periodontitis |
| D6             | 73         | Caucasian        | M          | Chronic Severe Generalized Periodontitis   |
| D7             | 27         | Asian            | M          | Generalized Aggressive Mild Periodontitis  |

**Supplemental Table 2.** Number of transcriptome reads with homologues in the SEED database

| <b>Subject</b> | <b>Archaea</b> | <b>Bacteria</b>  | <b>Eukaryota</b> | <b>Viruses</b> | <b>Other</b>  |
|----------------|----------------|------------------|------------------|----------------|---------------|
| <b>Health</b>  |                |                  |                  |                |               |
| H1             | 0.17% (1304)   | 93.71% (719052)  | 4.94% (37876)    | 0.10% (780)    | 1.08% (8271)  |
| H2             | 0.13% (1162)   | 96.02% (831492)  | 2.47% (21395)    | 0.07% (565)    | 1.31% (11326) |
| H3             | 0.28% (1439)   | 94.93% (483677)  | 3.71% (18922)    | 0.09% (457)    | 0.98% (5008)  |
| H4             | 0.16% (1376)   | 88.68% (767227)  | 9.66% (83569)    | 0.14% (1224)   | 1.36% (11751) |
| H5             | 0.21% (1964)   | 90.45% (838305)  | 8.81% (81620)    | 0.09% (856)    | 0.44% (4032)  |
| H6             | 0.22% (1431)   | 78.80% (503607)  | 16.34% (104442)  | 0.28% (1777)   | 4.35% (27830) |
| H7             | 0.17% (790)    | 89.41% (406158)  | 3.17% (14418)    | 0.20% (890)    | 7.04% (32002) |
| H8             | 0.16% (1032)   | 81.11% (517909)  | 15.96% (101939)  | 0.13% (826)    | 2.64% (16834) |
| H9             | 0.22% (1411)   | 95.9% (608531)   | 3.43% (21790)    | 0.38% (2441)   | 0.06% (386)   |
| <b>Disease</b> |                |                  |                  |                |               |
| D1             | 0.01% (36)     | 95.99% (338077)  | 3.80% (11196)    | 0.072% (246)   | 0.76% (2660)  |
| D2             | 0.28% (1749)   | 93.83% (595916)  | 3.81% (24195)    | 0.14% (918)    | 1.94% (12347) |
| D3             | 0.17% (1324)   | 93.81% (715349)  | 3.00% (22903)    | 0.23% (1767)   | 2.78% (21199) |
| D4             | 0.16% (899)    | 94.22% (541845)  | 3.24% (18657)    | 0.24% (1345)   | 2.15% (12340) |
| D5             | 0.19% (830)    | 95.25% (409507)  | 2.74% (11765)    | 0.19% (822)    | 1.63% (6992)  |
| D6             | 0.17% (1824)   | 95.41% (1030009) | 2.78% (30042)    | 0.20% (2174)   | 1.44% (15589) |
| D7             | 0.20% (1762)   | 93.23% (815873)  | 5.68% (49670)    | 0.06% (511)    | 0.84% (7326)  |
