# Supplementary material for: Transcriptome analysis of bacteriophage communities in periodontal health and disease
Source: PubMed Central journal article supplement (PMC4515923; doi:10.1186/s12864-015-1781-0), 2015-07-28
Supplement: 12864_2015_1781_MOESM2_ESM.pdf [file 12864_2015_1781_MOESM2_ESM.pdf]

# Supplemental Figure 1

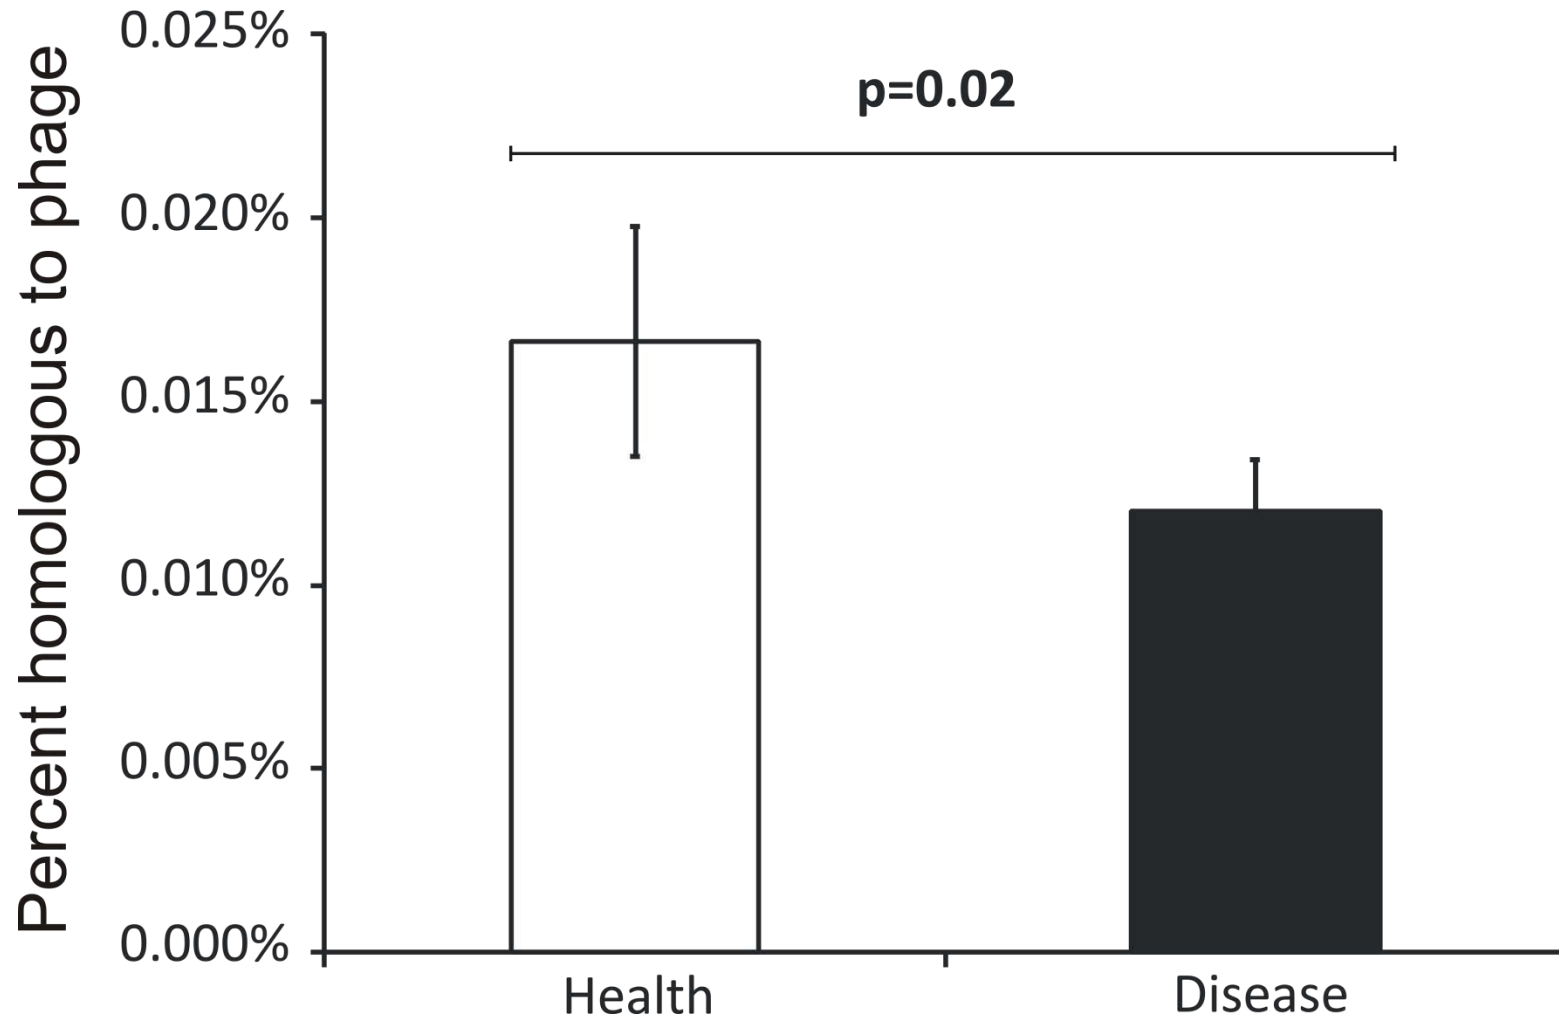

**Supplemental Figure 1:** Bar plots of the total number of identifiable phage genes expressed in relative periodontal health or significant periodontal disease.

## Supplemental Figure 2

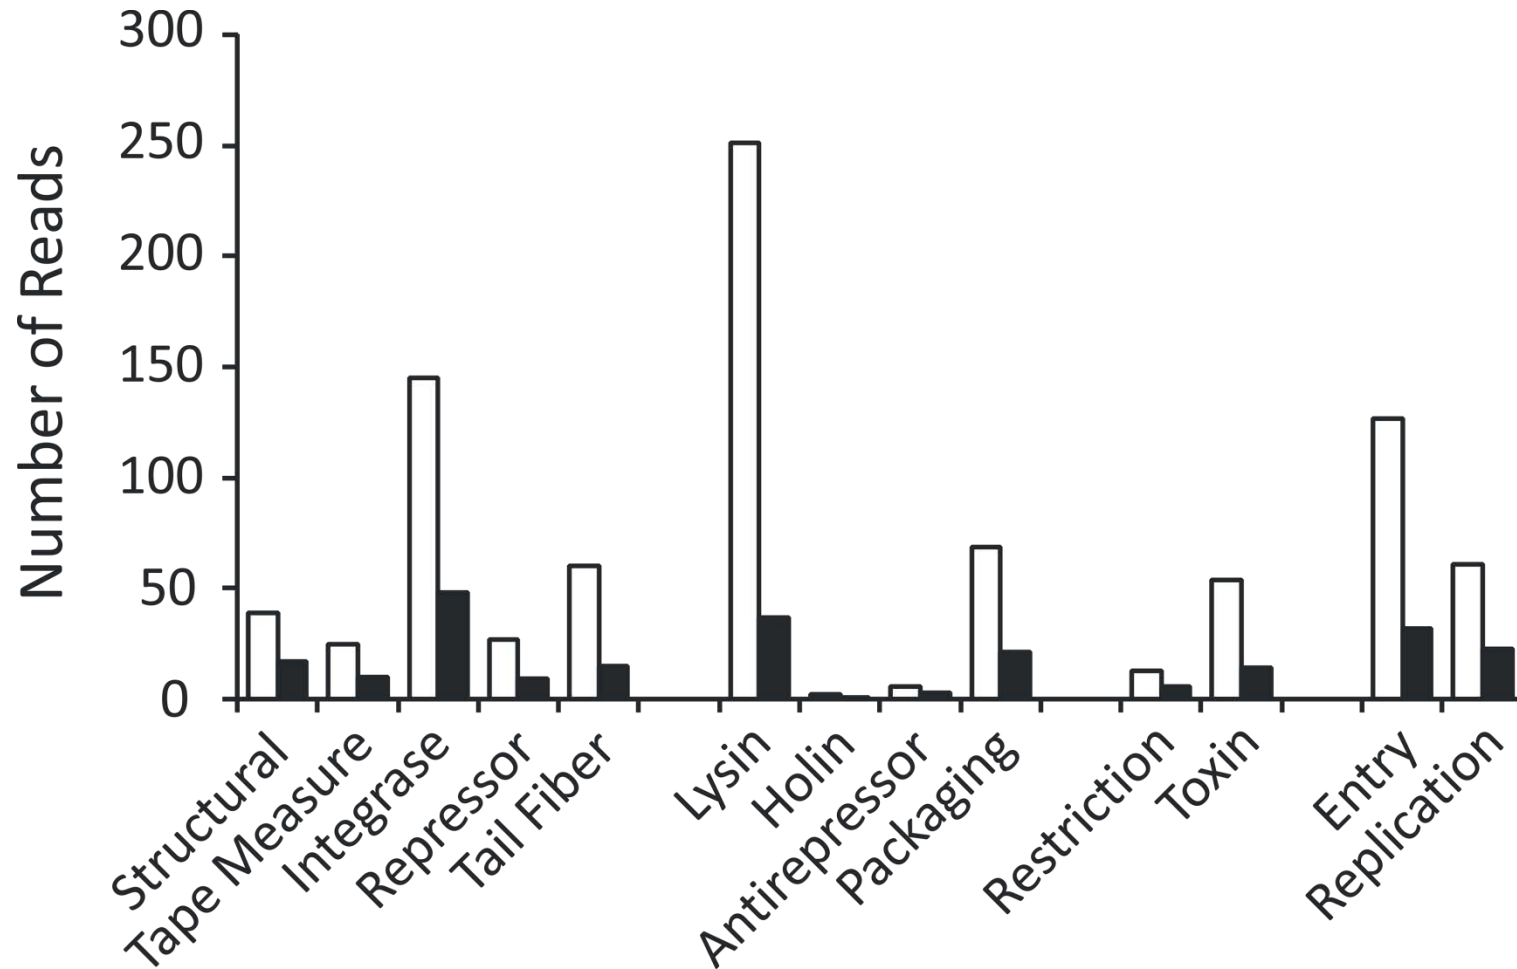

**Supplemental Figure 2:** Number of transcriptome reads with identifiable phage homologues in subjects with periodontal health (white bar) or disease (black bar).

# Supplemental Figure 3

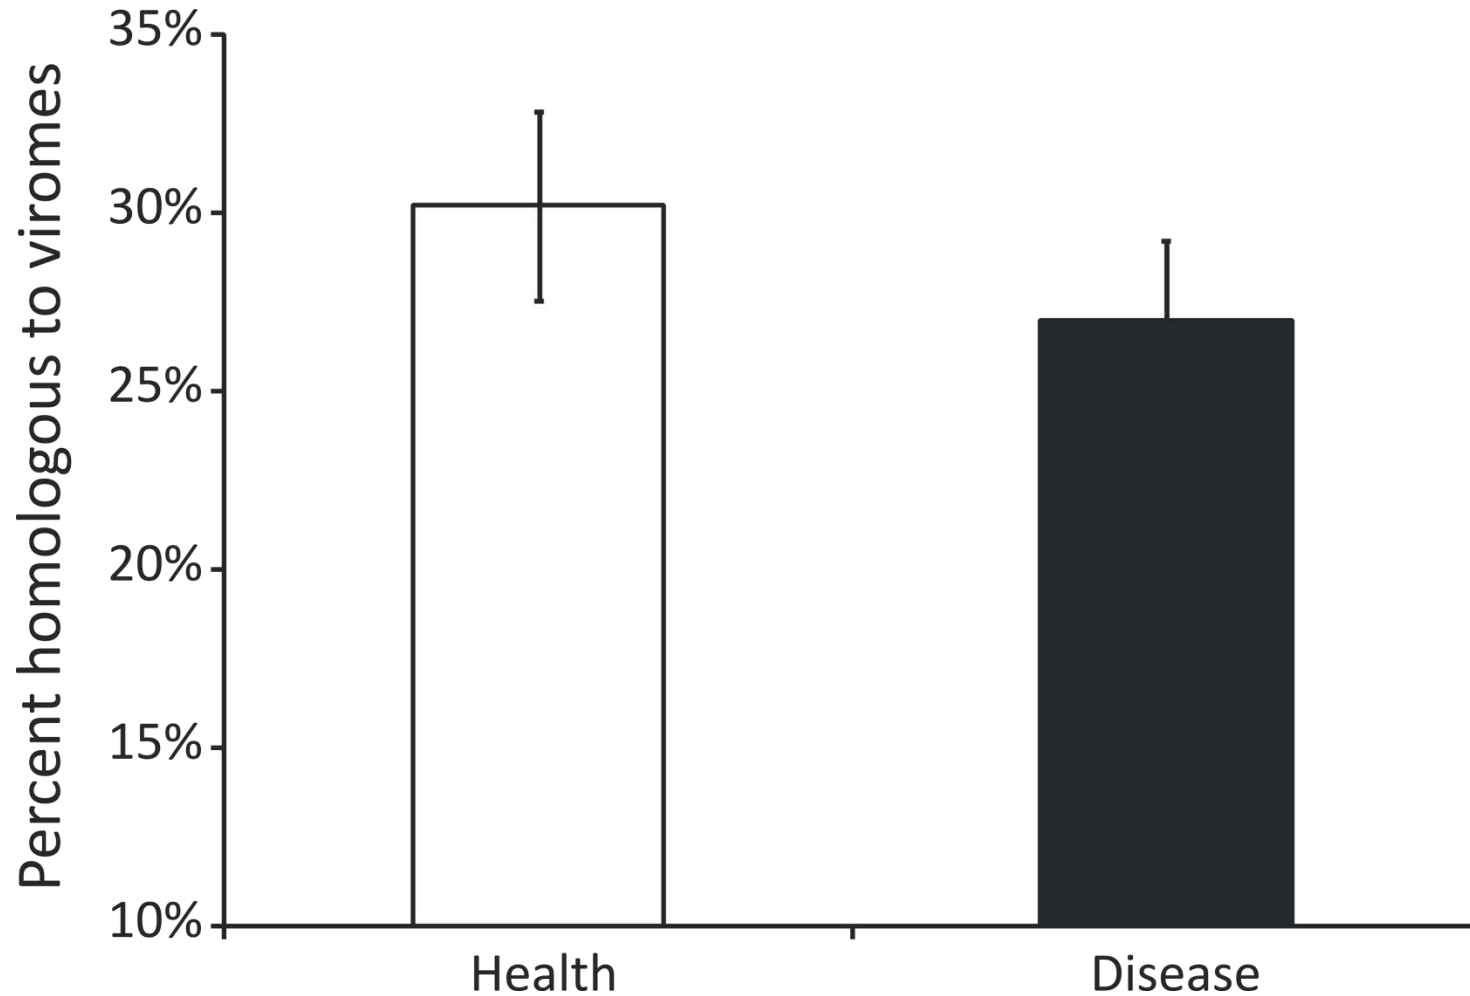

**Supplemental Figure 3:** Percentage ( $\pm$ standard deviation) of transcriptome reads from subjects with periodontal health (white bar) or disease (black bar) that were homologous to virome sequences from all subjects.
